# Supplementary material for: Metformin attenuates cardiac remodeling in mice through the Nrf2/Keap1 signaling pathway
Source: PubMed Central journal article supplement — Exp Ther Med. 2020 May 18;20(2):838–45. doi: 10.3892/etm.2020.8764 (PMC7388283; doi:10.3892/etm.2020.8764), 2020-05-18
Supplement: Supplementary_Data.pdf [file Supplementary_Data.pdf]

Table SI. Sequences of primers.

| Gene                   | Sequence (5'-3')                                                     |
|------------------------|----------------------------------------------------------------------|
| Col I (mouse)          | Forward: CTCCTCTTAGGGGCCACT<br>Reverse: CCACGTCTCACCATTGGGG          |
| Col III (mouse)        | Forward: GTAGATGAATTGGGATGCA<br>Reverse: ACATGGTTCTGGCTTCCAG         |
| TGF- $\beta$ 1 (mouse) | Forward: CTAATGGTGGACCGCAACAAC<br>Reverse: CACTGCTTCCCGAATGTCTGA     |
| Nrf2 (mouse)           | Forward: ATGATGGACTTGGAGTTGCC<br>Reverse: TCCTGTTCCCTTCTGGAGTTG      |
| HO-1 (mouse)           | Forward: AGGAGATAGAGCGCAACAAGCAGA<br>Reverse: CCAGTGAGGCCCATACCAGAAG |
| Keap1 (mouse)          | Forward: GGCAGGACCAGTTGAACAGT<br>Reverse: GGGTCACCTCACTCCAGGTA       |
| GAPDH (mouse)          | Forward: GACAAAATGGTGAAGGTCGGTG<br>Reverse: TGATGTTAGTGGGGTCTCGCTC   |

HO-1, heme oxygenase 1; Keap1, kelch-like ECH-associated protein 1; Nrf2, nuclear factor (erythroid-derived 2)-like2; TGF, transforming growth factor.
